# Supplementary material for: High adsorption of ammonia in a titanium-based metal–organic framework
Source: Royal Society of Chemistry journal article supplement (doi:10.1039/d4cc01449a), 2024-01-01
Supplement: d4cc01449a1.pdf [file d4cc01449a1.pdf]

## Supplementary Information

### High adsorption of ammonia in a titanium-based metal-organic framework

Xiangdi Zeng,<sup>a</sup> Jiangnan Li,<sup>a,b</sup> Meng He,<sup>a</sup> Wanpeng Lu,<sup>a</sup> Danielle Crawshaw,<sup>a</sup> Lixia Guo,<sup>a,b</sup> Yujie Ma,<sup>a</sup> Meredydd Kippax-Jones,<sup>a,c</sup> Yongqiang Cheng,<sup>d</sup> Pascal Manuel,<sup>e</sup> Svemir Rudić,<sup>e</sup> Mark D. Frogley,<sup>c</sup> Martin Schröder<sup>a\*</sup> and Sihai Yang<sup>a,b\*</sup>

a. Department of Chemistry, University of Manchester, Manchester, M13 9PL, UK.

MSchroder@manchester.ac.uk; Sihai.Yang@manchester.ac.uk

b. College of Chemistry and Molecular Engineering, Beijing National Laboratory for Molecular Sciences, Peking University, Beijing, 100871, China

Sihai.Yang@pku.edu.cn

c. Diamond Light Source, Harwell Science Campus, Oxfordshire, OX11 0DE, UK.

d. Neutron Scattering Division, Neutron Sciences Directorate, Oak Ridge National Laboratory, Oak Ridge, TN 37831, USA

e. ISIS Neutron and Muon Facility, Rutherford Appleton Laboratory, Didcot, OX11 0QX, UK.

### Content

1. Experimental Section
2. Characterisation of Porosity
3. SEM and EDX mapping
4. Thermogravimetric Analysis
5. Powder X-ray Diffraction
6. Stability Test
7. *In situ* synchrotron FTIR
8. Fitting of Isotherm Data
9. Neutron Powder Diffraction
10. Inelastic Neutron Scattering
11. Supplementary Tables
12. Author Contribution Section
13. Supplementary References

## Experimental Section

### Synthesis of {Ti<sub>8</sub>AF} cluster

The {Ti<sub>8</sub>AF} cluster was synthesised according to the published method<sup>1</sup>. To a 250 mL round-bottomed flask, formic acid (100 mL), acetic anhydride (100 mL), were added with stirring at room temperature. Ti(iPrO)<sub>4</sub> (20 mL) was then slowly added to the solution. The mixture was refluxed at 120°C for 12 h, and after cooling to room temperature, the white product was collected by filtration or centrifugation and washed in boiling acetone.

### Synthesis of MFM-300(Ti)

{Ti<sub>8</sub>AF} (220 mg, 0.16mmol) and H<sub>4</sub>bptc (330 mg, 1.0 mmol) were placed into a 23 mL Teflon reactor followed by the addition of acetic anhydride (5 mL) and acetic acid (5 mL). After stirring for 10 min, MeOH (0.5 mL) was added, and the mixture stirred at room temperature for a further 10 mins. The reaction was then heated in an oven at 180°C for 12h and then cooled to room temperature to give a white product, which was collected by filtration, washed with hot DMF and acetone, and dried in the air. Yield: 300 mg [[Ti<sub>2</sub>(O)<sub>2</sub>(C<sub>16</sub>H<sub>6</sub>O<sub>8</sub>)(H<sub>2</sub>O)<sub>2</sub>(C<sub>3</sub>H<sub>6</sub>O)<sub>0.7</sub>] (60%) (average of five parallel reactions). The synthesis can be readily scaled up or down using the same ratio of reactants. Analytically calculated (Found) for [Ti<sub>2</sub>(O)<sub>2</sub>(C<sub>16</sub>H<sub>6</sub>O<sub>8</sub>)(H<sub>2</sub>O)<sub>2</sub>(C<sub>3</sub>H<sub>6</sub>O)<sub>0.7</sub>] %: Ti 18.0, (18.1); C 41.0 (41.2); H 2.70 (2.36); N 0.0 (0.0).

### Adsorption isotherms and cycling experiments

In a typical gas adsorption experiment, ca. 50 mg of MFM-300(Ti) was loaded into the IGA system and activated at 333K for 2 h and then heated to 423 K under dynamic high vacuum ( $1 \times 10^{-8}$  mbar) for 12 h to give fully desolvated MFM-300(Ti) for the isotherm experiment.

Gravimetric sorption isotherms (0-1.0 bar) for NH<sub>3</sub> were recorded at different temperatures, maintained using a temperature-programmed water bath, on a Hiden Isochema IGA-003 system under ultra-high vacuum ( $10^{-10}$  bar) using a turbo pumping system. Research-grade NH<sub>3</sub> was purchased from BOC and used as received. For cycling experiments, trace amounts of water in the NH<sub>3</sub> were removed, and the pressure of NH<sub>3</sub> was increased from vacuum ( $1 \times 10^{-8}$  mbar) to 100 mbar and the uptake recorded. The pressure was reduced to regenerate the sample with no assisted heating. This cycling process was repeated multiple times.

Volumetric cryogenic CO<sub>2</sub> isotherms were performed on Tristar II Plus using ultrahigh purity CO<sub>2</sub> at 195 K for void volumetric determination. The BET surface area was calculated using the software integrated into the instrument.

### Breakthrough experiment

The MOF sample was activated at 393 K under dynamic vacuum for 16 h before breakthrough experiments, and 100 mg of desolvated sample packed into fixed-bed reactors. The sample was heated to 423 K under He flow for 2 h to achieve further activation. The fixed-bed was cooled to 298 K and the breakthrough experiment performed with a stream of 1000 ppm NH<sub>3</sub> diluted in He. The flow rate of the gas mixture was 100 mL min<sup>-1</sup>. A Bruker Matrix MG5 FTIR spectrometer was used to analyze the outlet gases for detection of NH<sub>3</sub>. The gas concentration, *C*, of NH<sub>3</sub> at the outlet was compared with the corresponding inlet concentration *C*<sub>0</sub>, where *C*/*C*<sub>0</sub> = 1 indicates complete breakthrough. To determine the dynamic adsorption capacity, the uptake of each component (*n*<sub>*m*</sub>) was calculated based on the breakthrough curves by the following equation:

$$V_m = - \frac{\int_0^t v_{gas\ out} dt - V_{dead}}{W_{MOF}} \quad [1]$$

$$n_m = \frac{PV_m}{RT} \quad [2]$$

where  $V_{gas\ out}$  is the flow rate of the target gas with the unit of  $\text{mL min}^{-1}$ ,  $V_{dead}$  is the dead volume of the system (mL),  $W$  represents the mass of sample packed in the breakthrough bed (g),  $t$  is the retention time for the specific gas (min),  $P$  is pressure (kpa),  $R$  is gas constant, and  $T$  is the measurement temperature (K).

### Elemental Analysis

Elemental analysis for C, H and N content of complexes was carried out using a CE-440 Elemental Analyser manufactured by Exeter Analytical. Element analysis for Ti was carried out using ICP-OES measurements on a Perkin-Elmer Optima 2000.

### Thermogravimetric analysis (TGA) Measurements

Thermogravimetric analysis was carried out under a flow of air ( $5 \text{ mL min}^{-1}$ ) with a heating rate of  $5 \text{ }^\circ\text{C min}^{-1}$  on a Perkin-Elmer Pyris1 Thermogravimetric analyser. TGA data for MFM-300(Ti) is shown in Figure S3.

### Fitting of isotherm data to the dual-site Langmuir-Freundlich model.

Adsorption isotherms of  $\text{NH}_3$  in MFM-300(Ti) were fitted using the dual-site Langmuir-Freundlich model [Equation 3], where  $n$  is the amount adsorbed in  $\text{mmol g}^{-1}$ ,  $P$  is the pressure in bar,  $q_{sat}$  is the saturation capacity in  $\text{mmol g}^{-1}$ ,  $b_1$  is the Langmuir parameter in  $\text{bar}^{-1}$ , and  $v_1$  and  $v_2$  are the Freundlich parameters for two sites 1 and 2. All values of  $R^2$  for the fits are  $> 0.98$  confirming an excellent fit to the model. Fittings for MFM-300(Ti) are shown in Figure S7

$$n = \frac{q_{sat1}b_1P^{v_1}}{1 + b_1P^{v_1}} + \frac{q_{sat2}b_2P^{v_2}}{1 + b_2P^{v_2}} \quad [3]$$

### Analysis and derivation of the isosteric heat of adsorption for adsorption of $\text{NH}_3$ for MFM-300(Ti)

Isotherms at 273-308 K were used to estimate the isosteric enthalpies ( $\Delta H$ ) for  $\text{NH}_3$  in MFM-300(Ti) and were fitted to the van 't Hoff equation [4];

$$\ln P = -\frac{\Delta H}{RT} + \frac{\Delta S}{R} \quad [4]$$

where  $P$  is pressure in bar,  $T$  is the temperature in K, and  $R$  is the ideal gas constant. All linear fittings show  $R^2$  above 0.98 confirming the consistency of the isotherm data and of the fitting. These results are summarized in Table S1 for MFM-300(Ti).

### Neutron Powder Diffraction (NPD)

Structural determination of the binding positions of  $\text{ND}_3$  within MFM-300(Ti) were conducted on WISH, a long-wavelength powder and single-crystal neutron diffractometer at the ISIS neutron and muon facility at Rutherford Appleton Laboratory (UK). The instrument incorporates a solid methane moderator, providing a high flux of cold neutrons with a large bandwidth, which is transported to the sample *via* an elliptical guide. The divergence jaws of WISH allow tuning of the resolution according to the need of the experiment; in this case, it was setup in high-resolution mode. The WISH detectors are 1 m long, 8 mm diameter pixelated  $^3\text{He}$  tubes positioned at 2.2 m from the sample and arranged on a cylindrical locus covering a  $2\theta$  scattering angle of  $10\text{--}170^\circ$ . To reduce the background from the sample environment, WISH is equipped with an oscillating radial collimator that defines a cylinder of radius of approximately 22 mm diameter at  $90^\circ$  scattering. The sample of desolvated MFM-300(Ti) was loaded into a cylindrical vanadium sample container with an indium vacuum seal connected to a gas handling system. The sample was degassed at  $1 \times 10^{-7}$  mbar and at 383 K for 4 days with He flushing to remove any remaining trace guest water molecules. The sample was dosed with  $\text{ND}_3$  using the volumetric method at room temperature to ensure that the gas was well dispersed throughout the crystalline structure of MFM-300(Ti). Data collection was performed at  $10 \pm 0.2$  K, controlled using a helium cryostat.

## Synchrotron Fourier Transform Infrared (FTIR) microspectroscopy

*In situ* gas-loaded synchrotron FTIR microspectroscopy was carried out at the Multimode InfraRed Imaging and Microspectroscopy (MIRIAM) beamline at the Diamond Light Source, Harwell Science Campus (UK). The instrument is comprised of a Bruker Hyperion 3000 microscope in transmission mode with a 15× objective and liquid-N<sub>2</sub>-cooled MCT detector, coupled to a Bruker Vertex 80V FTIR interferometer using radiation generated from a bending magnet source. Spectra were collected (512 scans) in the range 500–4000 cm<sup>-1</sup> at 4 cm<sup>-1</sup> resolution and infrared spot size at the sample of approximately 15 × 15 μm. Samples were placed onto a zinc selenide (ZnSe) disk and placed within a Linkam FTIR 600 gastight sample cell, which was equipped with ZnSe windows, a heating stage, and gas inlet and outlets. The N<sub>2</sub> (Air products, high purity BIP grade) was used as supplied.

NH<sub>3</sub> was dosed volumetrically into the sample cell using mass flow controllers, the total flow rate being maintained at 100 cm<sup>3</sup> min<sup>-1</sup> for all experiments. The gases were directly vented to an exhaust system, and the total pressure in the cell was maintained at 1 bar for all experiments. The sample was desolvated under a flow of dry N<sub>2</sub> at 100 cm<sup>3</sup> min<sup>-1</sup> and 423 K for 3 h, and then cooled to room temperature under a continuous flow of N<sub>2</sub>.

## Inelastic neutron scattering

INS spectra were collected on the TOSCA beamline at ISIS Neutron and Muon Source (UK). The sample of desolvated MFM-300(Ti) was loaded into a cylindrical vanadium sample container with an indium vacuum seal and this was connected to a gas handling system. The sample was degassed at 393 K and 10<sup>-7</sup> mbar for 24 h to remove any residual trace of guest water. The temperature during data collection was controlled using a closed cycle refrigerator cryostat (10 ± 0.1 K). The loading of NH<sub>3</sub> was performed volumetrically at room temperature, and subsequently the temperature was reduced to 10 K in order to minimize achievable thermal motion of the framework and adsorbed NH<sub>3</sub> molecules in the scattering measurements. Background spectra of MFM-300(Ti) were subtracted to obtain the difference spectra.

Modelling by Density Functional Theory (DFT) of the bare and NH<sub>3</sub>-loaded MFM-300(Ti) was performed using the Vienna Ab initio Simulation Package (VASP)<sup>2</sup>. The calculation used the Projector Augmented Wave (PAW) method<sup>3,4</sup> to describe the effects of core electrons, and Perdew-Burke-Ernzerhof (PBE)<sup>5</sup> implementation of the Generalized Gradient Approximation (GGA) for the exchange-correlation functional. The energy cutoff was 800 eV for the plane-wave basis of the valence electrons. The lattice parameters and atomic coordinates determined by neutron powder diffraction in this work were used as the initial structure, and the electronic structure was calculated on the  $\Gamma$ -point for the unit cell (144 atoms for the blank MOF). The total energy tolerance for electronic energy minimization was 10<sup>-8</sup> eV, and for structure optimization it was 10<sup>-7</sup> eV. The maximum interatomic force after relaxation was below 0.001 eV/Å, and the optB86b-vdW functional for dispersion corrections was applied.<sup>6</sup> The vibrational eigen-frequencies and modes were calculated by solving the force constants and dynamical matrix using Phonopy.<sup>7</sup> The OClimax software was used to convert the DFT-calculated phonon results to the simulated INS spectra.<sup>8</sup>

## Figures and Tables

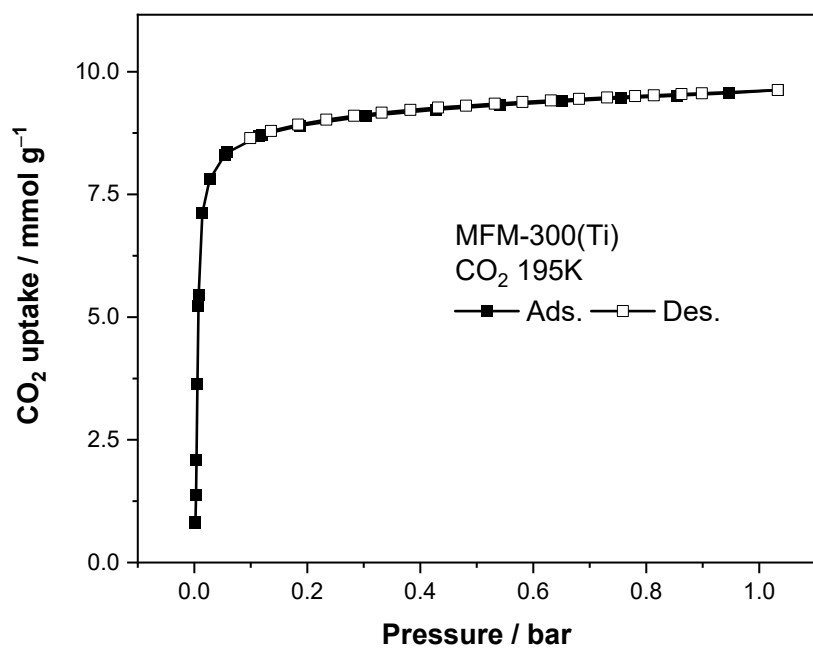

Figure S1. CO<sub>2</sub> adsorption data for MFM-300(Ti) at 195 K.

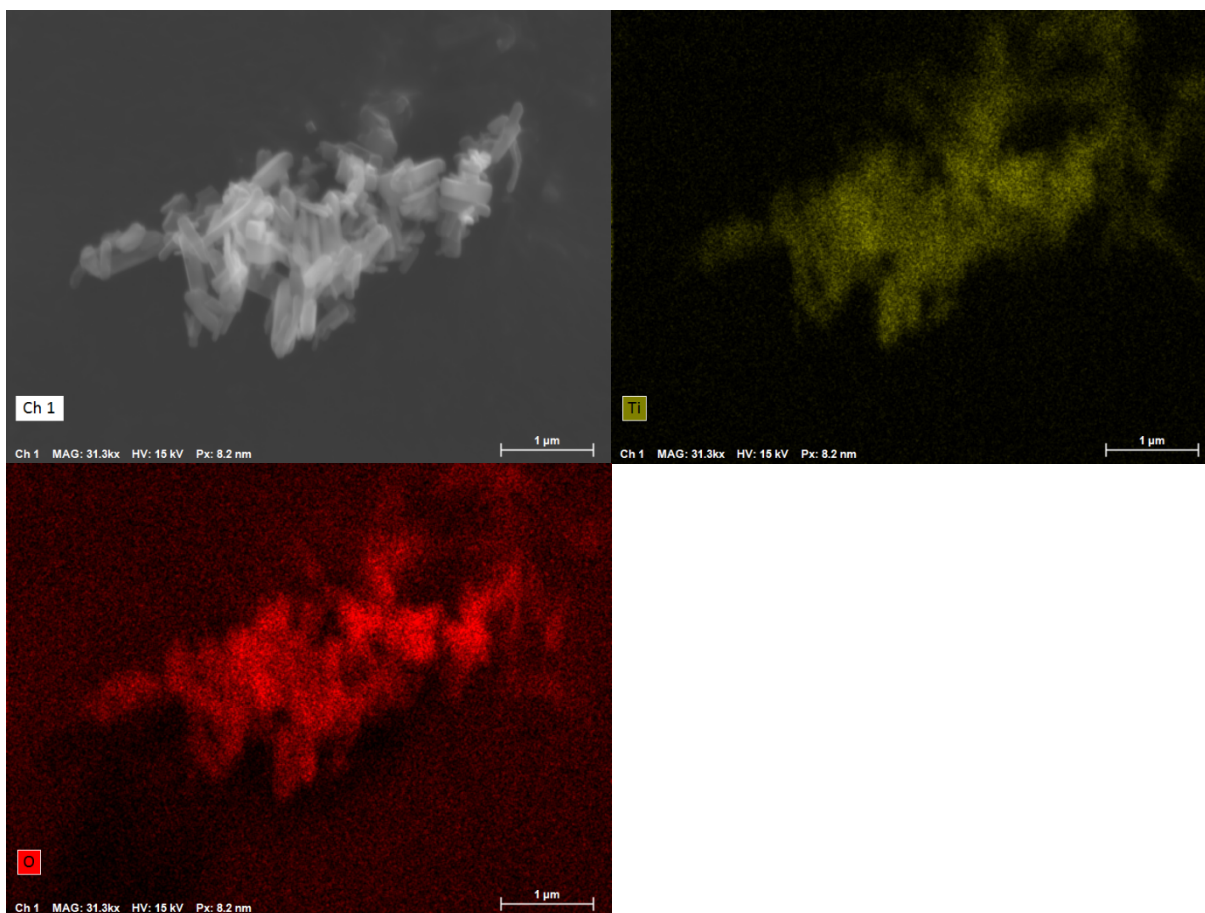

Figure S2. SEM and EDX images of MFM-300(Ti).

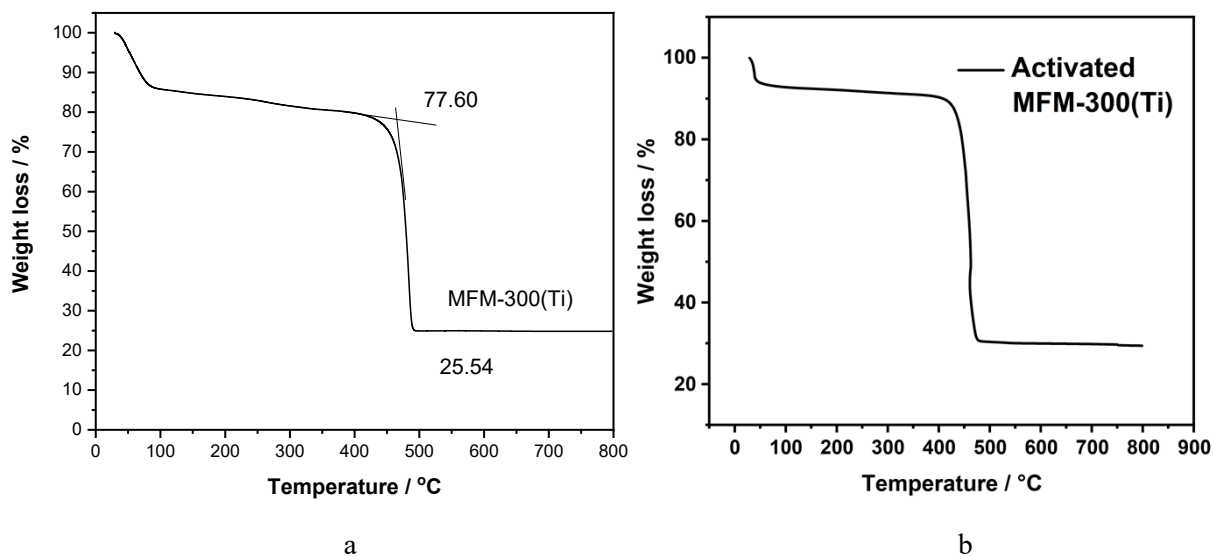

**Figure S3.** TGA plots for as-synthesised (a) and desolvated (b) MFM-300(Ti) at a heating rate of  $5\text{ }^{\circ}\text{C min}^{-1}$  from  $40\text{ }^{\circ}\text{C}$  to  $800\text{ }^{\circ}\text{C}$  in air. In figure a, the weight loss below  $150\text{ }^{\circ}\text{C}$  corresponds to the free solvents in the pore. The weight loss between  $400$  and  $500\text{ }^{\circ}\text{C}$  corresponds to the decomposition of the organic ligand, and the residue is titanium oxide. In figure b, the minor weight loss below  $100\text{ }^{\circ}\text{C}$  is likely due to the surface water adsorbed during the sample transfer.

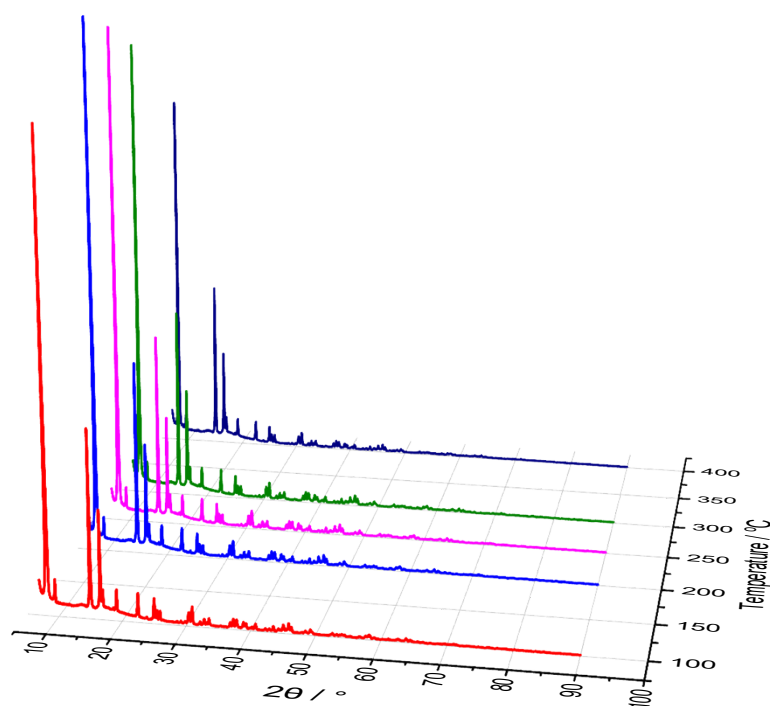

**Figure S4.** PXRD patterns of MFM-300(Ti) at different temperatures.

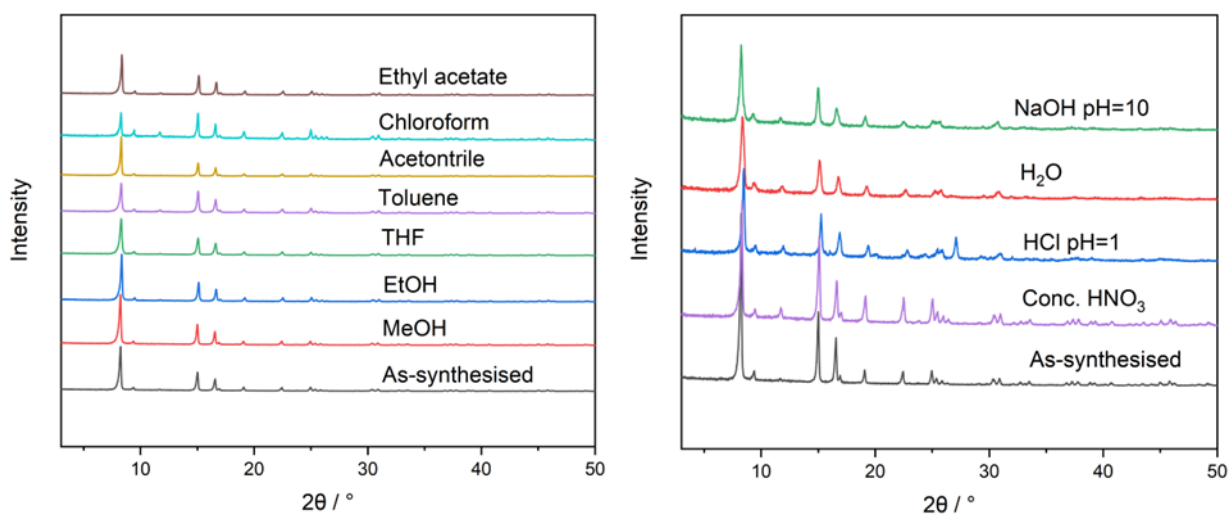

**Figure S5.** PXRD patterns of MFM-300(Ti) under different conditions.

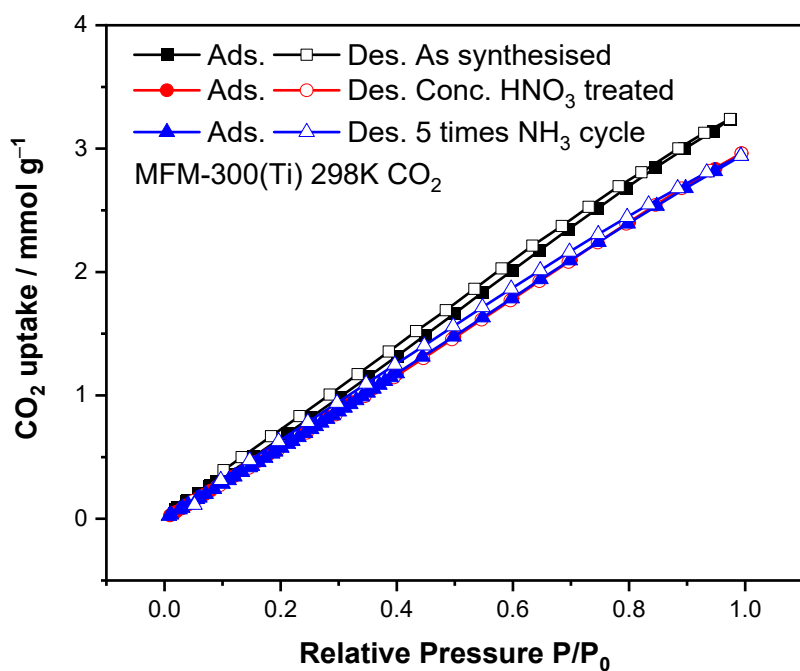

**Figure S6.** CO<sub>2</sub> adsorption data of activated, concentrated HNO<sub>3</sub> treated, and post NH<sub>3</sub>-ads-des MFM-300(Ti) at 298 K.

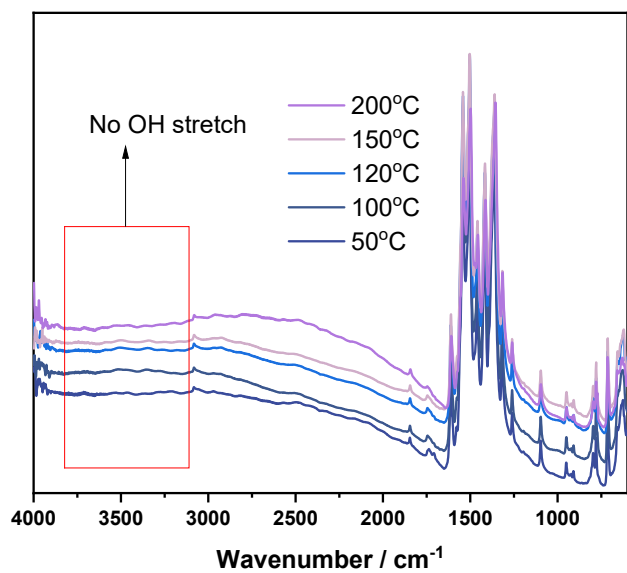

**Figure S7.** *In situ* synchrotron FTIR spectra of MFM-300(Ti) as a function of temperature under a dry N<sub>2</sub> flow at 100 mL min<sup>-1</sup>.



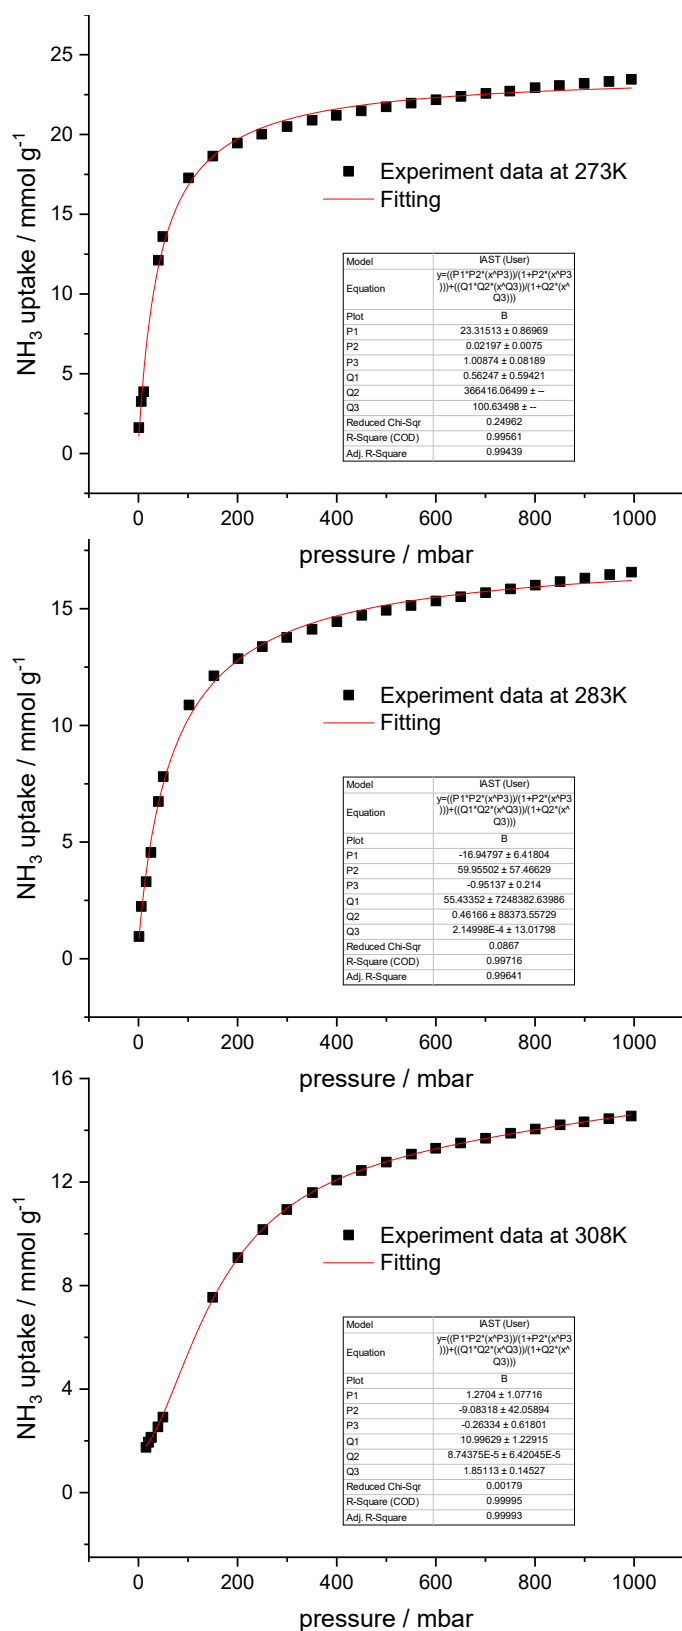

**Figure S8.** Fitting of isotherm data to the Dual-Site Langmuir-Freundlich Model.

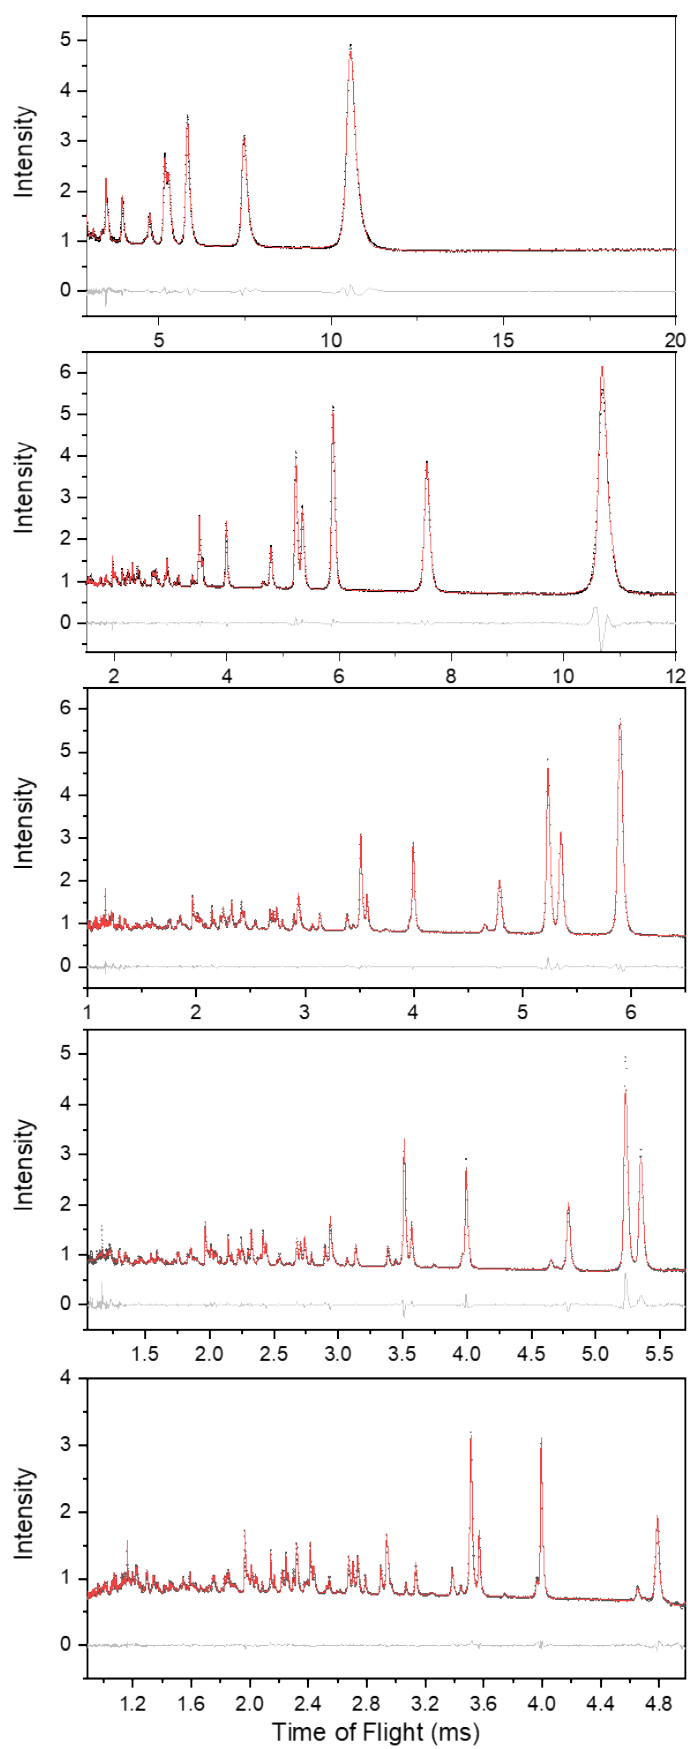

**Figure S9.** Neutron diffraction patterns and Rietveld refinement for MFM-300(Ti) (banks 1 to 5 from top to bottom).

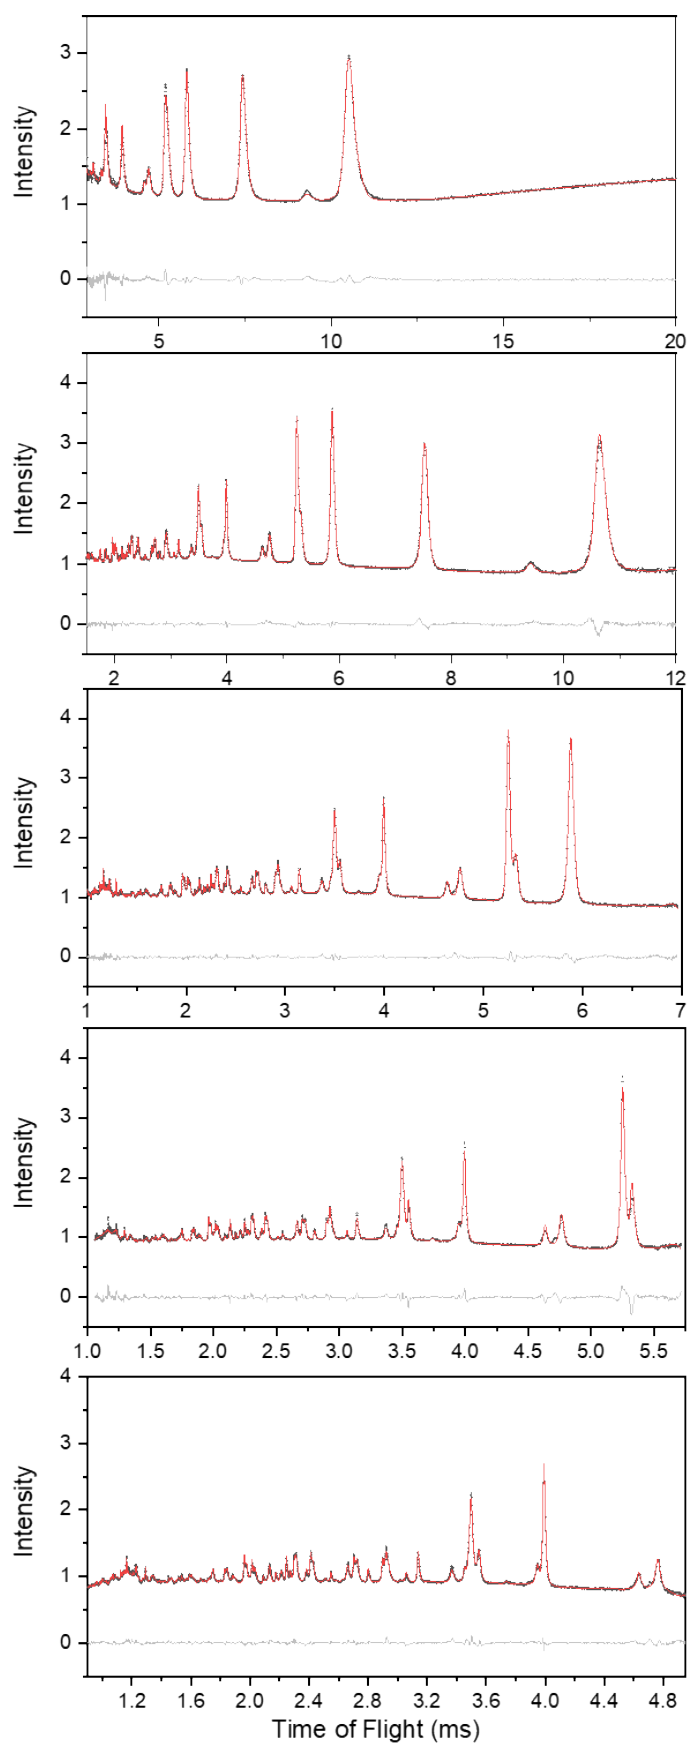

**Figure S10.** Neutron diffraction patterns and Rietveld refinement for MFM-300(Ti)·0.84 ND<sub>3</sub> (banks 1 to 5 from top to bottom).

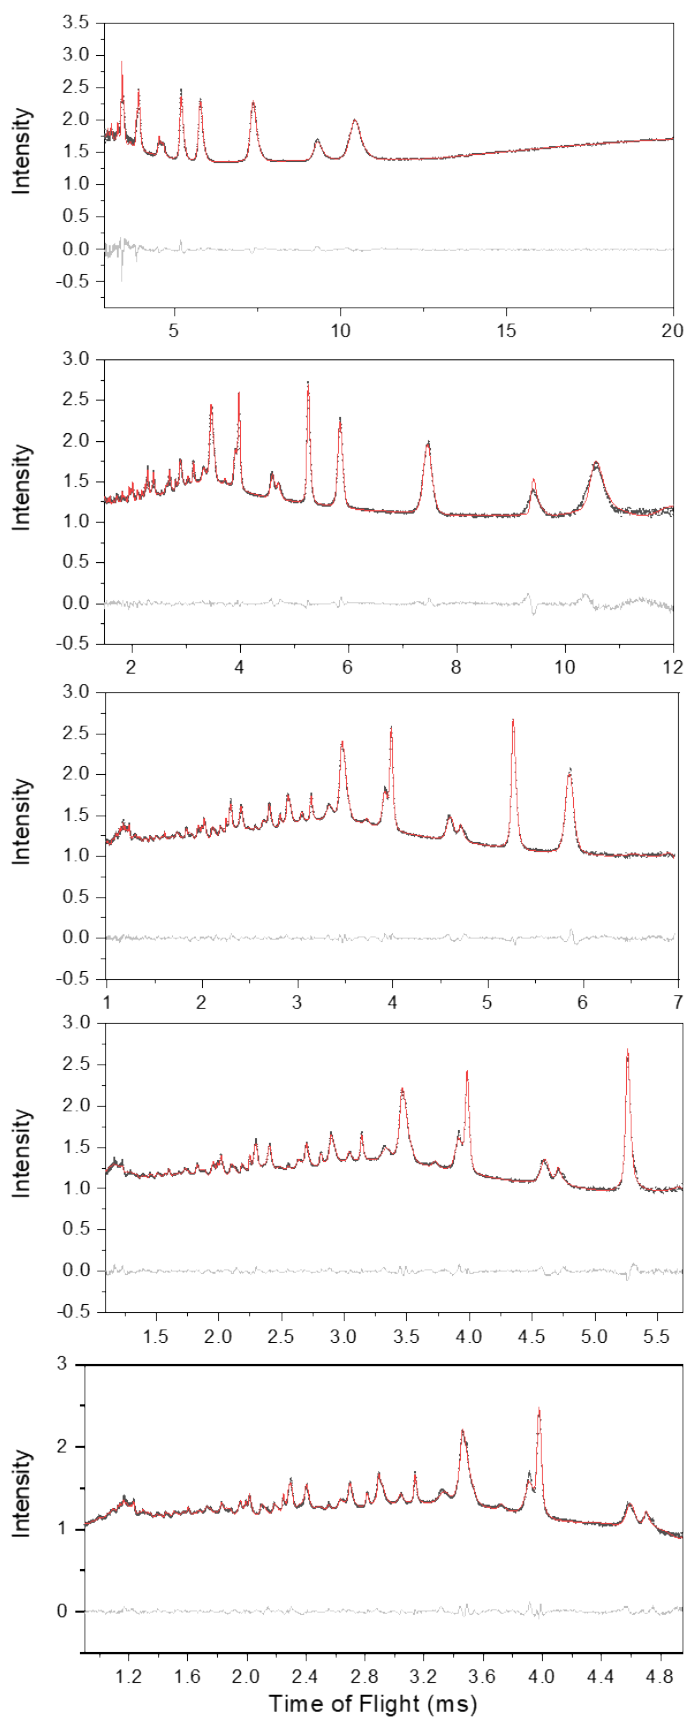

**Figure S11.** Neutron diffraction patterns and Rietveld refinement for MFM-300(Ti)·2.54 ND<sub>3</sub> (banks 1 to 5 from top to bottom).

## Inelastic neutron scattering

INS was applied to study the binding interaction and structure dynamics in this case because of its several unique advantages:

- (a) INS spectroscopy is ultra-sensitive to the vibrations of hydrogen atoms, which is ten times more visible than other elements due to its high neutron cross-section.
- (b) The technique is not subject to any optical selection rules, neither restricted to the centre of the Brillouin zone (gamma point). All vibrations are active and, in principle, measurable.
- (c) INS spectra can be readily and accurately modelled: the intensities are proportional to the concentration of elements in the sample and their cross-sections, and the measured INS intensities relate straightforwardly to the associated displacements of the scattering atom. Treatment of background correction is also relatively straightforward.
- (d) Neutrons penetrate deep into materials and pass readily through the walls of metal containers making neutrons ideal to measure bulk properties of materials.
- (e) INS spectrometers cover the whole range of the molecular vibrational spectrum, 0–500 meV (0–4000 cm<sup>-1</sup>).
- (f) Calculation of the INS spectra by DFT vibrational analysis can be readily achieved, and DFT calculations relate directly to the INS spectra, and, in the case of solid-state calculations, there are no approximations other than the use of DFT eigenvectors and eigenvalues to determine the spectral intensities. Assignments of features on the experimental difference spectra are described in main text.

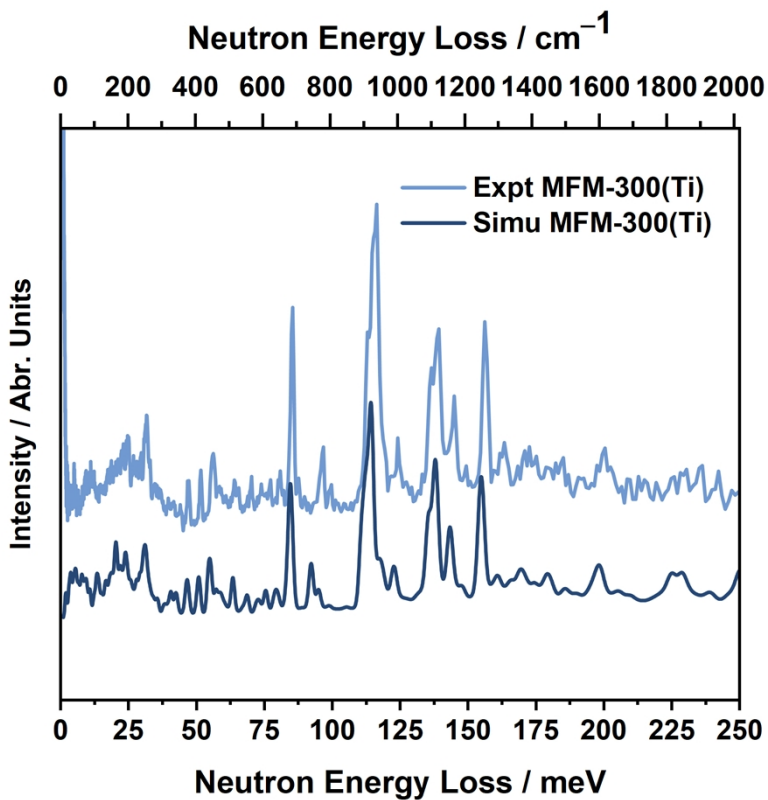

Figure S12. Experimental and simulated INS spectra of MFM-300(Ti).

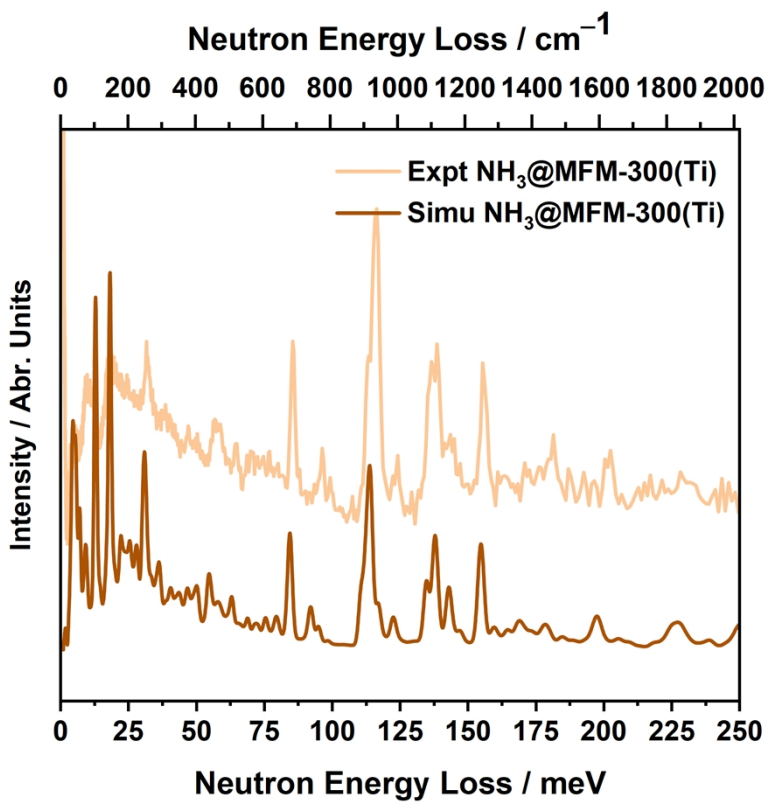

Figure S13. Experimental and simulated INS spectra of NH<sub>3</sub>-loaded MFM-300(Ti).

**Table S1.** Summary of the pore volume, NH<sub>3</sub> isothermal adsorption capacities and NH<sub>3</sub> packing density in stable MOF materials.

| MOF                                                         | Measuring condition  | Pore volume (cm <sup>3</sup> g <sup>-1</sup> ) | NH <sub>3</sub> isothermal uptake (mmol g <sup>-1</sup> ) | NH <sub>3</sub> packing density/g cm <sup>-3</sup> | Reference        |
|-------------------------------------------------------------|----------------------|------------------------------------------------|-----------------------------------------------------------|----------------------------------------------------|------------------|
| <b>MFM-300(Ti)</b>                                          | <b>298 K 1.0 bar</b> | <b>0.47<sup>b</sup></b>                        | <b>16.1</b>                                               | <b>0.58</b>                                        | <b>This work</b> |
|                                                             | <b>273 K 1.0 bar</b> |                                                | <b>23.4</b>                                               | <b>0.84</b>                                        | <b>This work</b> |
| 43.4% LiCl@MIL-53-(OH) <sub>2</sub>                         | 298 K 1.0 bar        | n/a                                            | 33.9                                                      | n/a                                                | 9                |
| M <sub>2</sub> (dobpdc)<br>(M=Mn, Co, Ni, Mg)               | 298 K 1.0 bar        | 1.18, 1.06, 1.11, 1.60 <sup>a</sup>            | 13.3, 13.3, 20.8, 23.9                                    | 0.19, 0.21, 0.32, 0.25                             | 10               |
| Ni_acryl_TMA                                                | 298 K 1.0 bar        | 0.57 <sup>a</sup>                              | 23.5                                                      | 0.70                                               | 11               |
| Ni_acryl_TGA                                                | 298 K 1.0 bar        | 0.56 <sup>a</sup>                              | 17.4                                                      | 0.53                                               | 11               |
| MOF-303                                                     | 298 K 1.0 bar        | 0.55 <sup>a</sup>                              | 19.7                                                      | 0.61 (293 K)                                       | 12               |
| MFM-300(M)<br>(M=V <sup>III</sup> , V <sup>IV</sup> , Fe)   | 273 K 1.0 bar        | 0.49, 0.48, 0.46 <sup>a</sup>                  | 16.1, 17.3, 15.6                                          | 0.54, 0.61, 0.60                                   | 13               |
| UiO-66-X<br>(M=defect, Cu <sup>I</sup> , Cu <sup>II</sup> ) | 273 K 1.0 bar        | 0.388 <sup>b</sup>                             | 11.8, 12.6, 16.9                                          | 0.52, 0.55, 0.74                                   | 14               |
| MFM-300(Al)                                                 | 273 K 1.0 bar        | 0.37 <sup>c</sup>                              | 15.7                                                      | 0.72                                               | 15               |
| M <sub>2</sub> Cl <sub>2</sub> BTDD<br>(M=Mn, Co, Ni)       | 298 K 1.0 bar        | n/a                                            | 15.5, 12.0, 12.0                                          | n/a                                                | 16               |
| MFM-300(Sc)                                                 | 298 K 1.0 bar        | 0.48 <sup>a</sup>                              | 13.1                                                      | 0.46                                               | 17               |
| MIL-160                                                     | 298 K 1.0 bar        | 0.45 <sup>a</sup>                              | 12.8                                                      | 0.48                                               | 18               |
| M <sub>2</sub> (adc) <sub>2</sub> (dabco)<br>(M=Zn, Co, Ni) | 295 K 1.0 bar        | 0.25 <sup>a</sup>                              | 8.3, 11.2, 12.1                                           | 0.56, 0.76, 0.82                                   | 19               |
| MFM-303(Al)                                                 | 293 K 1.0 bar        | 0.191 <sup>b</sup>                             | 9.0                                                       | 0.80                                               | 20               |
| NU-1401                                                     | 298 K 1.0 bar        | 0.23 <sup>a</sup>                              | 8.4                                                       | 0.62                                               | 21               |
| Al-PMOF                                                     | 298 K 1.0 bar        | n/a                                            | 7.7                                                       | n/a                                                | 22               |

<sup>a</sup>: pore volume determined from N<sub>2</sub> isotherms at 77 K.

<sup>b</sup>: pore volume from crystal structure.

<sup>c</sup>: pore volume determined from CO<sub>2</sub> isotherms at 195 K.

**Table S2.** Thermodynamic parameters for NH<sub>3</sub> adsorption in MFM-300(Ti).

| n<br>mmol g <sup>-1</sup> | $Q_{st}$<br>kJ mol <sup>-1</sup> | $Q_{st}$ error<br>kJ mol <sup>-1</sup> | $\Delta S$<br>J K <sup>-1</sup> mol <sup>-1</sup> | $\Delta S$ error<br>J K <sup>-1</sup> mol <sup>-1</sup> | R <sup>2</sup> |
|---------------------------|----------------------------------|----------------------------------------|---------------------------------------------------|---------------------------------------------------------|----------------|
| 3.0                       | 43.8                             | 3.42                                   | -212                                              | 11.7                                                    | 0.987          |
| 3.5                       | 43.7                             | 3.37                                   | -214                                              | 11.6                                                    | 0.988          |
| 4.0                       | 43.3                             | 3.40                                   | -214                                              | 11.6                                                    | 0.988          |
| 4.5                       | 42.9                             | 3.48                                   | -213                                              | 11.9                                                    | 0.987          |
| 5.0                       | 42.4                             | 3.58                                   | -213                                              | 12.3                                                    | 0.986          |
| 5.5                       | 41.9                             | 3.69                                   | -212                                              | 12.6                                                    | 0.985          |
| 6.0                       | 41.5                             | 3.80                                   | -212                                              | 13.0                                                    | 0.983          |
| 6.5                       | 41.1                             | 3.89                                   | -211                                              | 13.3                                                    | 0.982          |
| 7.0                       | 40.8                             | 3.95                                   | -211                                              | 13.5                                                    | 0.981          |
| 7.5                       | 40.5                             | 3.98                                   | -211                                              | 13.7                                                    | 0.981          |
| 8.0                       | 40.3                             | 3.97                                   | -211                                              | 13.6                                                    | 0.981          |
| 8.5                       | 40.3                             | 3.91                                   | -212                                              | 13.4                                                    | 0.981          |
| 9.0                       | 40.3                             | 3.78                                   | -212                                              | 12.9                                                    | 0.982          |
| 9.5                       | 40.4                             | 3.57                                   | -214                                              | 12.2                                                    | 0.985          |
| 10.0                      | 40.7                             | 3.26                                   | -216                                              | 11.2                                                    | 0.987          |
| 10.5                      | 41.2                             | 2.84                                   | -218                                              | 9.74                                                    | 0.991          |
| 11.0                      | 41.9                             | 2.30                                   | -221                                              | 7.89                                                    | 0.994          |
| 11.5                      | 42.8                             | 1.64                                   | -226                                              | 5.60                                                    | 0.997          |
| 12.0                      | 44.1                             | 0.87                                   | -231                                              | 2.98                                                    | 0.999          |
| 12.5                      | 45.7                             | 0.07                                   | -237                                              | 0.238                                                   | 1.000          |
| 13.0                      | 47.6                             | 0.68                                   | -245                                              | 2.33                                                    | 0.999          |
| 13.5                      | 49.8                             | 1.32                                   | -254                                              | 4.52                                                    | 0.999          |
| 14.0                      | 52.2                             | 1.90                                   | -264                                              | 6.51                                                    | 0.997          |
| 14.5                      | 54.4                             | 2.58                                   | -273                                              | 8.86                                                    | 0.995          |



**Table S3.** Crystallography data for MFM-300(Ti).

| Sample Name                    | MFM-300(Ti)-desolvated                  | MFM-300(Ti)·0.84ND <sub>3</sub>                                            | MFM-300(Ti)·2.54ND <sub>3</sub>                                            |
|--------------------------------|-----------------------------------------|----------------------------------------------------------------------------|----------------------------------------------------------------------------|
| CCDC number                    | 2296493                                 | 2296494                                                                    | 2296495                                                                    |
| Crystal system                 | Tetragonal                              | Tetragonal                                                                 | Tetragonal                                                                 |
| Space Group                    | I 4 <sub>1</sub> 2 2                    | I 4 <sub>1</sub> 2 2                                                       | I 4 <sub>1</sub> 2 2                                                       |
| Formula                        | [Ti <sub>2</sub> (O) <sub>2</sub> bptc] | [Ti <sub>2</sub> (O) <sub>2</sub> bptc] (ND <sub>3</sub> ) <sub>0.84</sub> | [Ti <sub>2</sub> (O) <sub>2</sub> bptc] (ND <sub>3</sub> ) <sub>2.54</sub> |
| a (Å)                          | 15.1203(4)                              | 15.0507(8)                                                                 | 14.9200(4)                                                                 |
| b (Å)                          | 15.1203(4)                              | 15.0507(8)                                                                 | 14.9200(4)                                                                 |
| c (Å)                          | 11.9863(3)                              | 12.0595(6)                                                                 | 12.1536(3)                                                                 |
| beta (°)                       | 90                                      | 90                                                                         | 90                                                                         |
| Cell Volume /Å <sup>3</sup>    | 2740.33(17)                             | 2731.8(3)                                                                  | 2705.47(15)                                                                |
| Cell density g/cm <sup>3</sup> | 1.100                                   | 1.138                                                                      | 1.221                                                                      |
| Method                         | Rietveld                                | Rietveld                                                                   | Rietveld                                                                   |
| Radiation                      | Neutron                                 | Neutron                                                                    | Neutron                                                                    |
| Scan method                    | Time of flight                          | Time of flight                                                             | Time of flight                                                             |
| R <sub>wp</sub> (%)            | 1.843                                   | 1.600                                                                      | 1.206                                                                      |
| R <sub>exp</sub> (%)           | 0.514                                   | 0.483                                                                      | 0.430                                                                      |
| GOF                            | 3.581                                   | 3.312                                                                      | 2.808                                                                      |

**Table S4.** Atomic positions for atoms in MFM-300(Ti).

|    | X           | y           | z           | Occupancy | Biso / Å <sup>2</sup> |
|----|-------------|-------------|-------------|-----------|-----------------------|
| Ti | 0.6968(2)   | 0.3032(2)   | 0.5         | 1         | 1.60(16)              |
| O1 | 0.74212(17) | 0.25        | 0.625       | 1         | 0.98(5)               |
| O2 | 0.6178(3)   | 0.3765(3)   | 0.6064(2)   | 1         | 0.98(5)               |
| O3 | 0.6032(3)   | 0.2890(2)   | 0.7571(3)   | 1         | 0.98(5)               |
| C1 | 0.5903(2)   | 0.36112(17) | 0.70484(18) | 1         | 1.15(3)               |
| C2 | 0.54079(7)  | 0.43068(6)  | 0.76148(15) | 1         | 1.15(3)               |
| C3 | 0.5         | 0.5         | 0.70290(18) | 1         | 1.15(3)               |
| C4 | 0.54079(7)  | 0.43068(6)  | 0.87864(10) | 1         | 1.15(3)               |
| C5 | 0.5         | 0.5         | 0.93722(9)  | 1         | 1.15(3)               |
| H3 | 0.5         | 0.5         | 0.6153(3)   | 1         | 1.38(4)               |
| H4 | 0.57129(14) | 0.37884(17) | 0.92244(16) | 1         | 1.38(4)               |

**Table S5.** Host-guest interactions in MFM-300(Ti)·(ND<sub>3</sub>)<sub>0.84</sub>

| MFM-300(Ti)·(ND <sub>3</sub> ) <sub>0.84</sub> | Interactions                           | Distance (Å) | Colour |
|------------------------------------------------|----------------------------------------|--------------|--------|
| Site I                                         | ND <sub>3</sub> ···O <sub>ligand</sub> | 2.10(2)      | Yellow |
|                                                | ND <sub>3</sub> ···O <sub>ligand</sub> | 2.25(3)      | Yellow |
|                                                | ND <sub>3</sub> ···O <sub>ligand</sub> | 2.97(3)      | Yellow |
| Site II                                        | ND <sub>3</sub> ···O <sub>ligand</sub> | 2.99(8)      | Yellow |
|                                                | ND <sub>3</sub> ···aromatic rings      | 2.73(15)     | Green  |

**Table S6:** Atomic positions in MFM-300(Ti)·(ND<sub>3</sub>)<sub>0.84</sub>

|       | x           | Y           | Z           | Occupancy  | Biso / Å <sup>2</sup> |
|-------|-------------|-------------|-------------|------------|-----------------------|
| Ti    | 0.6951(3)   | 0.3049(3)   | 0.5         | 1          | 0.5(2)                |
| O1    | 0.7332(3)   | 0.25        | 0.625       | 1          | 1.36(8)               |
| O2    | 0.6171(5)   | 0.3786(5)   | 0.6084(4)   | 1          | 1.36(8)               |
| O3    | 0.6006(5)   | 0.2885(4)   | 0.7634(5)   | 1          | 1.36(8)               |
| C1    | 0.5916(3)   | 0.3583(3)   | 0.7054(3)   | 1          | 2.04(6)               |
| C2    | 0.54100(12) | 0.43063(10) | 0.7626(2)   | 1          | 2.04(6)               |
| C3    | 0.5         | 0.5         | 0.7045(3)   | 1          | 2.04(6)               |
| C4    | 0.54100(12) | 0.43063(10) | 0.87869(17) | 1          | 2.04(6)               |
| C5    | 0.5         | 0.5         | 0.93675(16) | 1          | 2.04(6)               |
| H3    | 0.5         | 0.5         | 0.6208(6)   | 1          | 2.45(7)               |
| H4    | 0.5705(3)   | 0.3806(3)   | 0.9205(3)   | 1          | 2.45(7)               |
| N_1_2 | 0.5792(13)  | 0.7071(8)   | 0.2201(18)  | 0.0716(19) | 1.0(7)                |
| D_2_2 | 0.521(6)    | 0.675(10)   | 0.234(3)    | 0.0716(19) | 1.2(8)                |
| D_3_2 | 0.593(2)    | 0.699(4)    | 0.1381(19)  | 0.0716(19) | 1.2(8)                |
| D_4_2 | 0.626(7)    | 0.672(8)    | 0.262(3)    | 0.0716(19) | 1.2(8)                |
| N_1_1 | 0.5546(9)   | 0.6910(8)   | 0.4351(12)  | 0.137(2)   | 10.0(8)               |
| D_2_1 | 0.545(2)    | 0.707(2)    | 0.5164(14)  | 0.137(2)   | 12.0(10)              |
| D_3_1 | 0.4935(13)  | 0.696(2)    | 0.399(3)    | 0.137(2)   | 12.0(10)              |
| D_4_1 | 0.570(2)    | 0.6250(10)  | 0.434(3)    | 0.137(2)   | 12.0(10)              |

| MFM-300(Ti) · (ND <sub>3</sub> ) <sub>2.54</sub> |           | Interactions                               | Distance (Å) |         | Colour     |
|--------------------------------------------------|-----------|--------------------------------------------|--------------|---------|------------|
| Site I                                           |           | ND <sub>3</sub> ···O <sub>ligand</sub>     | 2.14(3)      |         | Yellow     |
|                                                  | x         | ND <sub>3</sub> ···O <sub>ligand</sub>     | z            | 2.55(3) | Occupancy  |
|                                                  |           |                                            |              |         | Yellow     |
| Ti                                               | Site II   | ND <sub>3</sub> ···aromatic rings          | 0.3142(6)    | 2.52(3) | Green      |
|                                                  | 0.6858(6) |                                            | 0.5          |         | 0.5(4)     |
| O1                                               | Site III  | ND <sub>3</sub> ···O <sub>bridge</sub>     | 0.25         | 2.47(6) | Yellow     |
|                                                  | 0.7266(5) |                                            | 0.625        |         | 0.50(9)    |
|                                                  |           | ND <sub>3</sub> ···O <sub>ligand</sub>     | 1.92(5)      |         | Yellow     |
|                                                  |           | ND <sub>3</sub> ···O <sub>ligand</sub>     | 2.33(6)      |         | Yellow     |
|                                                  |           | ND <sub>3</sub> ···O <sub>ligand</sub>     | 2.38(6)      |         | Yellow     |
|                                                  |           | ND <sub>3</sub> ···O <sub>ligand</sub>     | 2.78(6)      |         | Yellow     |
|                                                  |           | D <sub>3</sub> N···H-C <sub>aromatic</sub> | 1.50(3)      |         | Light blue |
|                                                  |           | D <sub>3</sub> N···H-C <sub>aromatic</sub> | 2.24(3)      |         | Light blue |

**Table S7:**  
Host-guest interactions in MFM -

300(Ti) · (ND<sub>3</sub>)<sub>2.54</sub>.

|       |            |            |            |          |          |
|-------|------------|------------|------------|----------|----------|
| O2    | 0.6193(11) | 0.3745(12) | 0.6109(7)  | 1        | 0.50(9)  |
| O3    | 0.5983(12) | 0.2831(7)  | 0.7685(9)  | 1        | 0.50(9)  |
| C1    | 0.5914(9)  | 0.3548(7)  | 0.7089(5)  | 1        | 3.25(8)  |
| C2    | 0.5414(3)  | 0.4295(2)  | 0.7642(4)  | 1        | 3.25(8)  |
| C3    | 0.5        | 0.5        | 0.7062(5)  | 1        | 3.25(8)  |
| C4    | 0.5414(3)  | 0.4295(2)  | 0.8800(3)  | 1        | 3.25(8)  |
| C5    | 0.5        | 0.5        | 0.9380(3)  | 1        | 3.25(8)  |
| H3    | 0.5        | 0.5        | 0.6219(8)  | 1        | 3.90(10) |
| H4    | 0.5715(6)  | 0.3782(5)  | 0.9222(4)  | 1        | 3.90(10) |
| N_1_2 | 0.4232(7)  | 0.1894(7)  | 0.7852(6)  | 0.378(4) | 10.0(5)  |
| D_2_2 | 0.3770(14) | 0.1988(19) | 0.8459(15) | 0.378(4) | 12.0(6)  |
| D_3_2 | 0.4270(17) | 0.1218(8)  | 0.774(2)   | 0.378(4) | 12.0(6)  |
| D_4_2 | 0.4832(11) | 0.2077(17) | 0.818(2)   | 0.378(4) | 12.0(6)  |
| N_1_1 | 0.6905(8)  | 0.6090(7)  | 0.7488(11) | 0.183(2) | 1.0(4)   |
| D_2_1 | 0.653(3)   | 0.5527(17) | 0.762(2)   | 0.183(2) | 1.2(5)   |
| D_3_1 | 0.7338(14) | 0.593(2)   | 0.6869(18) | 0.183(2) | 1.2(5)   |
| D_4_1 | 0.7291(15) | 0.617(3)   | 0.8173(16) | 0.183(2) | 1.2(5)   |
| N_1_3 | 0.2993(18) | 0.5827(18) | 0.002(2)   | 0.075(2) | 1.0(10)  |
| H_2_3 | 0.267(4)   | 0.595(4)   | 0.075(4)   | 0.075(2) | 1.2(12)  |
| H_3_3 | 0.298(4)   | 0.642(3)   | -0.040(5)  | 0.075(2) | 1.2(12)  |
| H_4_3 | 0.259(4)   | 0.540(4)   | -0.040(5)  | 0.075(2) | 1.2(12)  |

**Table S8:**  
Atomic positions in MFM - 300(Ti)·(ND<sub>3</sub>)<sub>2.5</sub>·4<sup>+</sup>

**Table S9:** C-C bond length in MFM-300(Ti), MFM-300(Ti) · (ND<sub>3</sub>)<sub>0.84</sub>, and MFM-300(Ti) · (ND<sub>3</sub>)<sub>2.54</sub>.

| Sample name                                      | Bond type    | Bond length |
|--------------------------------------------------|--------------|-------------|
| MFM-300(Ti)                                      | C-C aromatic | 1.458(2)    |
| MFM-300(Ti) · (ND <sub>3</sub> ) <sub>0.84</sub> |              | 1.497(4)    |
| MFM-300(Ti) · (ND <sub>3</sub> ) <sub>2.54</sub> |              | 1.500(7)    |

### Author Contribution Section

XZ, JL and LG: synthesis and characterisation of materials, measurements of adsorption data. XZ, MH, WL, DC, YM, PM and SR: measurements and analysis of NPD and INS data, structure determination. XZ, MKJ and MDF: measurements and analysis of the FTIR data. MS and SY: overall direction of the project. XZ, MS and SY: preparation of the manuscript with contributions from all authors.

## Supplementary References

1. S. Wang, H. Reinsch, N. Heymans, M. Wahiduzzaman, C. Martineau-Corcós, G. De Weireld, G. Maurin and C. Serre, *Matter*, 2020, **2**, 440-450.
2. G. Kresse and J. Furthmüller, *Phys. Rev. B*, 1996, **54**, 11169.
3. P. E. Blöchl, *Phys. Rev. B*, 1994, **50**, 17953.
4. G. Kresse and D. Joubert, *Phys. Rev. B*, 1999, **59**, 1758.
5. J. P. Perdew, K. Burke and M. Ernzerhof, *Phys. Rev. Lett.*, 1996, **77**, 3865.
6. J. Klimeš, D. R. Bowler and A. Michaelides, *J. Phys.: Condens. Matter*, 2009, **22**, 022201.
7. A. Togo and I. Tanaka, *Scr. Mater.*, 2015, **108**, 1-5.
8. Y. Cheng, L. L. Daemen, A. I. Kolesnikov and A. J. Ramirez-Cuesta, *J. Chem. Theory Comput.*, 2019, **15**, 1974-1982.
9. Y. Shi, Z. Wang, Z. Li, H. Wang, D. Xiong, J. Qiu, X. Tian, G. Feng and J. Wang, *Angew. Chem. Int. Ed.*, 2022, **61**, e202212032.
10. D. W. Kim, D. W. Kang, M. Kang, J. H. Lee, J. H. Choe, Y. S. Chae, D. S. Choi, H. Yun and C. S. Hong, *Angew. Chem. Int. Ed.*, 2020, **59**, 22531-22536.
11. D. W. Kim, D. W. Kang, M. Kang, D. S. Choi, H. Yun, S. Y. Kim, S. M. Lee, J.-H. Lee and C. S. Hong, *J. Am. Chem. Soc.*, 2022, **144**, 9672-9683.
12. Z. Wang, Z. Li, X.-G. Zhang, Q. Xia, H. Wang, C. Wang, Y. Wang, H. He, Y. Zhao and J. Wang, *ACS Appl. Mater. Interfaces*, 2021, **13**, 56025-56034.
13. X. Han, W. Lu, Y. Chen, I. Da Silva, J. Li, L. Lin, W. Li, A. M. Sheveleva, H. G. Godfrey, Z. Lu, F. Tuna, E. J. L. McInnes, Y. Cheng, L. L. Daemen, L. J. M. McPherson, S. J. Teat, M. D. Frogley, S. Rudić, P. Manuel, A. J. Ramirez-Cuesta, S. Yang and M. Schröder, *J. Am. Chem. Soc.*, 2021, **143**, 3153-3161.
14. Y. Ma, W. Lu, X. Han, Y. Chen, I. Da Silva, D. Lee, A. M. Sheveleva, Z. Wang, J. Li and W. Li, M. Fan, S. Xu, F. Tuna, E. J. L. McInnes, Y. Cheng, S. Rudić, P. Manuel, M. D. Frogley, A. J. Ramirez-Cuesta, M. Schröder and S. Yang, *J. Am. Chem. Soc.*, 2022, **144**, 8624-8632.
15. H. G. Godfrey, I. da Silva, L. Briggs, J. H. Carter, C. G. Morris, M. Savage, T. L. Easun, P. Manuel, C. A. Murray, C. C. Tang, M. D. Frogley, G. Cinque, S. Yang and M. Schröder, *Angew. Chem. Int. Ed.*, 2018, **130**, 14994-14997.
16. A. J. Rieth, Y. Tulchinsky and M. Dincă, *J. Am. Chem. Soc.*, 2016, **138**, 9401-9404.
17. L. Guo, X. Han, Y. Ma, J. Li, W. Lu, W. Li, D. Lee, I. Da Silva, Y. Cheng, S. Rudić, P. Manuel, M. D. Frogley, A. J. Ramirez-Cuesta, M. Schröder and S. Yang, *Chem. Commun.*, 2022, **58**, 5753-5756.
18. L. Guo, J. Hurd, M. He, W. Lu, J. Li, D. Crawshaw, M. Fan, S. Sapchenko, Y. Chen, X. Zeng, M. Kippax-Jones, W. Huang, Z. Zhu, P. Manuel, M. D. Frogley, D. Lee, M. Schröder and S. Yang, *Commun. Chem.*, 2023, **6**, 55.
19. Z. Cao, K. N. Landström and F. Akhtar, *Catalysts*, 2020, **10**, 1444.
20. C. Marsh, X. Han, J. Li, Z. Lu, S. P. Argent, I. Da Silva, Y. Cheng, L. L. Daemen, A. J. Ramirez-Cuesta, S. P. Thompson, A. J. Blake, S. Yang and M. Schröder, *J. Am. Chem. Soc.*, 2021, **143**, 6586-6592.
21. Y. Zhang, X. Zhang, Z. Chen, K. i. Otake, G. W. Peterson, Y. Chen, X. Wang, L. R. Redfern, S. Goswami, P. Li, T. Islamoglu, B. Wang and O. K. Farha, *ChemSusChem*, 2020, **13**, 1710-1714.
22. J. Liu, Z. Lu, Z. Chen, M. Rimoldi, A. J. Howarth, H. Chen, S. Alayoglu, R. Q. Snurr, O. K. Farha and J. T. Hupp, *ACS Appl. Mater. Interfaces*, 2021, **13**, 20081-20093.
